# Supplementary material for: Impacts of COVID-19 on Air Quality through Traffic Reduction
Source: MDPI journal article supplement (doi:10.3390/ijerph19031718), 2022-02-02
Supplement: s1 [file s1]

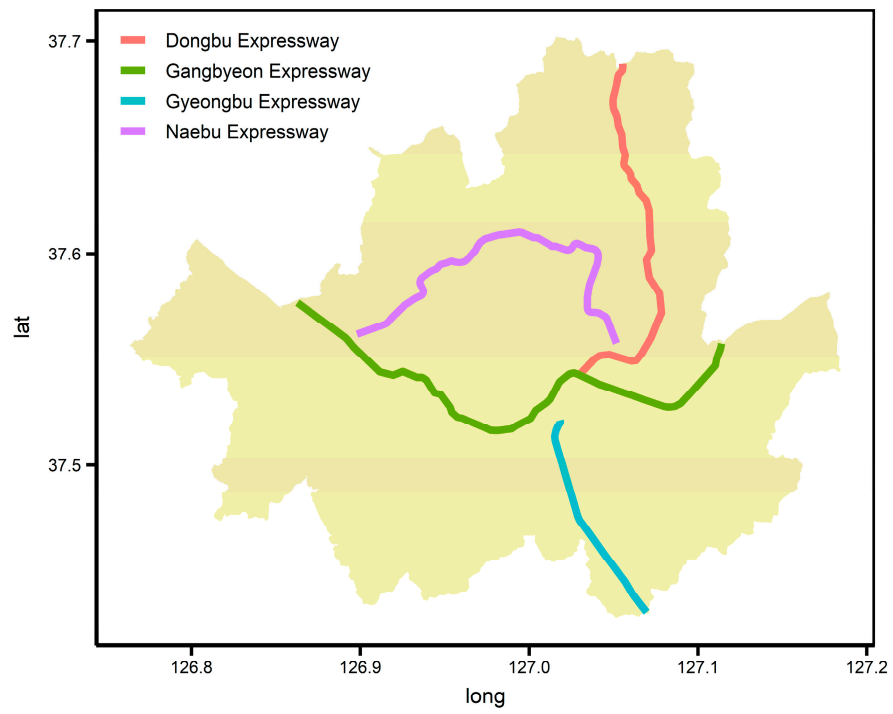

**Figure S1.** Map of Seoul with four expressways.

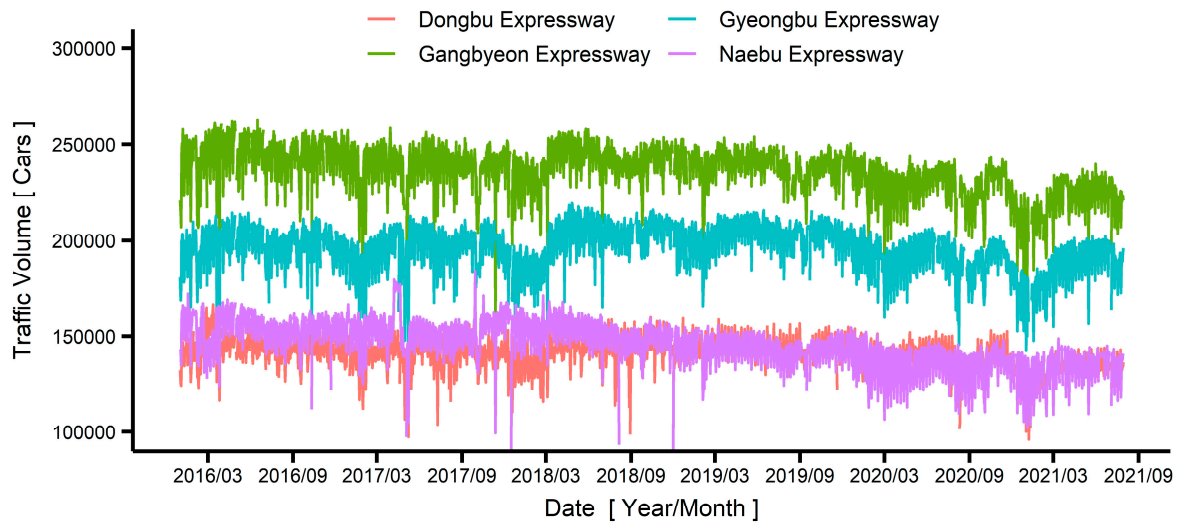

**Figure S2.** Daily traffic volume at four expressways in Seoul from 2016 to 2021.

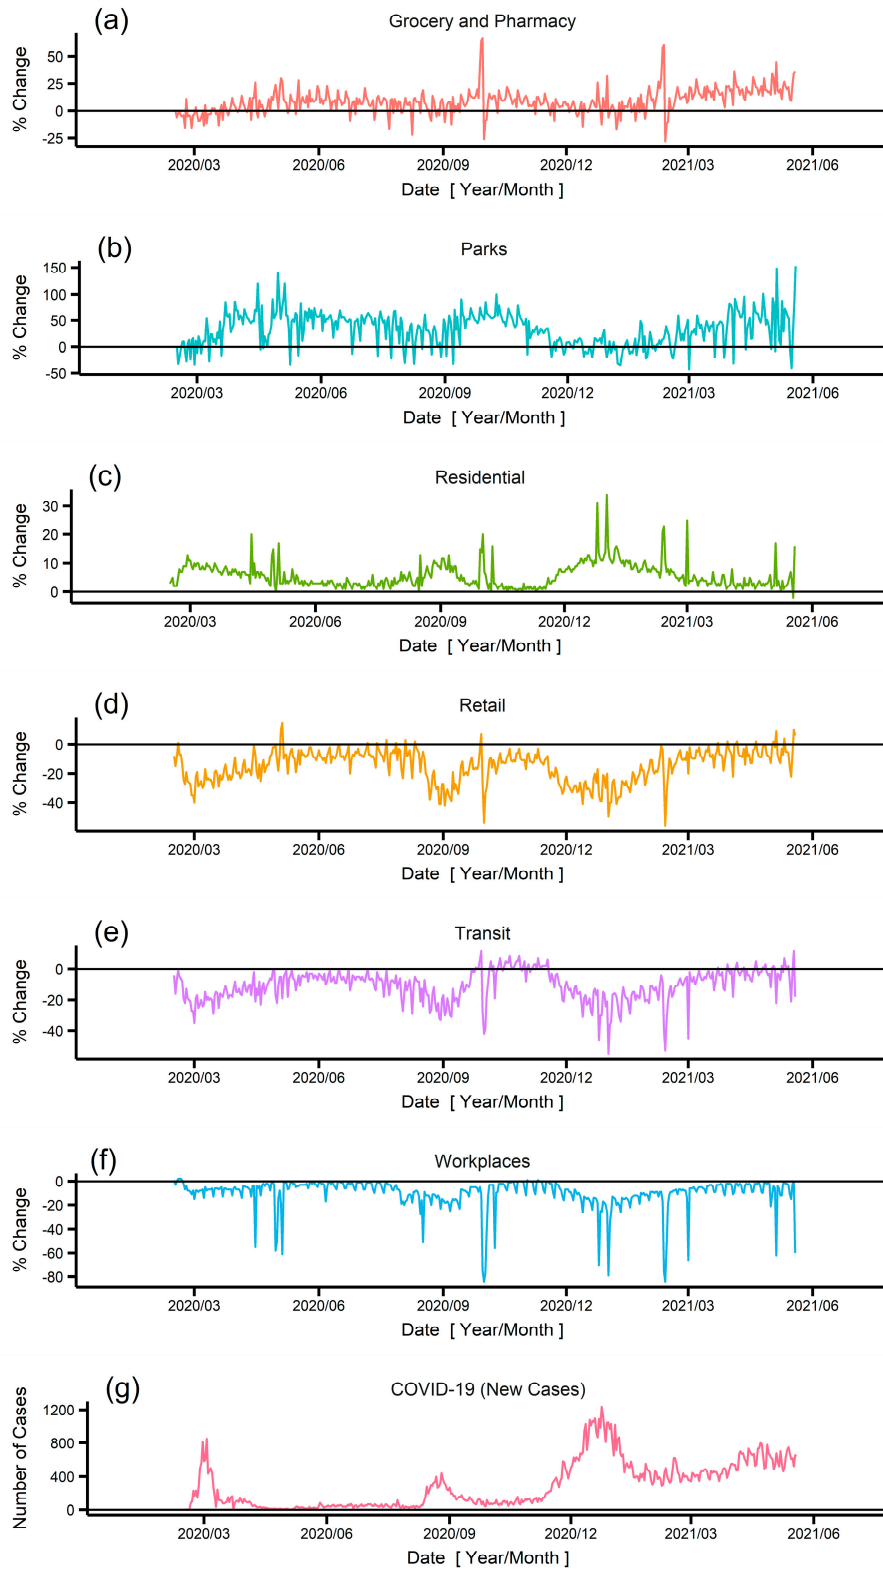

**Figure S3.** (a)–(f) Google Mobility data in Seoul: (a) Grocery and Pharmacy, (b) Parks, (c) Residential, (d) Retail, (e) Transit, (f) Workplaces. (g) the number of new COVID-19 cases in South Korea between February 2020 and June 2021.

**Table S1.** Fitness test ( $R^2$ ) of the models and significance test of the traffic factor.

|                   | $R^2$ of the Model | Traffic                           |                                   |         |
|-------------------|--------------------|-----------------------------------|-----------------------------------|---------|
|                   |                    | Coefficient                       | Std. Error                        | P-value |
| PM <sub>10</sub>  | 0.44               | 0.219 $\mu\text{g}/\text{m}^3/\%$ | 0.157 $\mu\text{g}/\text{m}^3/\%$ | 0.162   |
| PM <sub>2.5</sub> | 0.37               | 0.233 $\mu\text{g}/\text{m}^3/\%$ | 0.099 $\mu\text{g}/\text{m}^3/\%$ | 0.018   |
| CO                | 0.62               | 2.161 ppb/%                       | 0.955 ppb/%                       | 0.023   |
| NO <sub>2</sub>   | 0.64               | 0.257 ppb/%                       | 0.066 ppb/%                       | 0.000   |
| O <sub>3</sub>    | 0.70               | 0.033 ppb/%                       | 0.057 ppb/%                       | 0.560   |
| SO <sub>2</sub>   | 0.59               | -0.0007 ppb/%                     | 0.006 ppb/%                       | 0.913   |
